# Supplementary material for: Network Dynamics Centered on the Right Middle Frontal Gyrus Modulate Implicit Facial Emotion Discrimination
Source: Research Square preprint supplement (doi:10.21203/rs.3.rs-7782526/v1), 2025-11-19
Supplement: Supplementary file 1 [file 1f698b9320bfc2c81fdf31a8.docx]

Figure S1. Reaction time of participants in discrinimating emotions under four conditions.

Each circle indicated the mean reaction time of each participant in discriminating emotions under each condition. Data were presented as mean ± SEM. One-way ANOVA was used to compare reaction times across four conditions (*P* < 0.0001, F(1.764, 17.64) = 33.86), with the Sidak test applied for post hoc comparisons (for SFSE vs. SFDE, ****P* < 0.0001; for SFSE vs. DFSE, ****P* < 0.0001; for SFSE vs. DFDE, ****P* < 0.0001; for SFDE vs DFSE, **P* = 0.0149; for SFDE vs. DFDE, *P* = 0.2168; and for DFSE vs. DFDE, *P* = 0.1323).

Abbreviation: SFSE, same face and same emotion; SFDE, same face and different emotions; DFSE, different faces and same emotions; DFDE, different faces and different emotions.


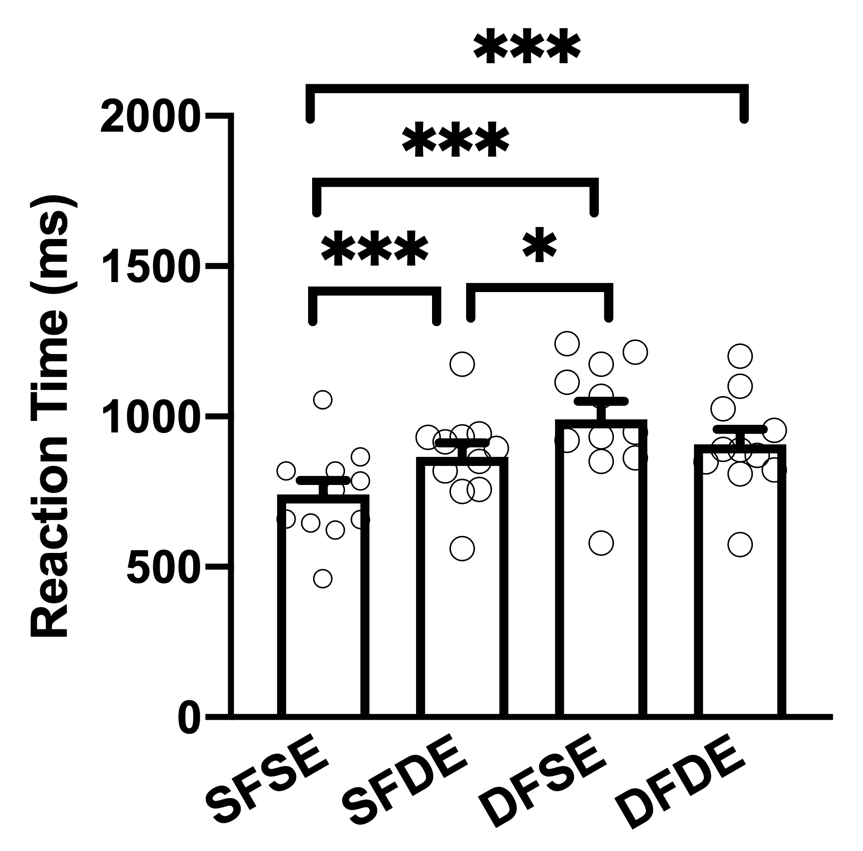


Figure S2. Correlations between participants’ performances and sex, age, as well as epileptic focus locations.

Spearman correlation of pairwise elements, including the age, sex, accuracies and reaction times of four conditions, and the laterization and focuci lobes. The correlation coefficient was shown in the heatmap, as the red indicated the positive correlation and the blue indicated the negative correlation as scale labeled. **P* < 0.05.

Abbreviation: SFSE, same face and same emotion; SFDE, same face and different emotions; DFSE, different faces and same emotions; DFDE, different faces and different emotions.


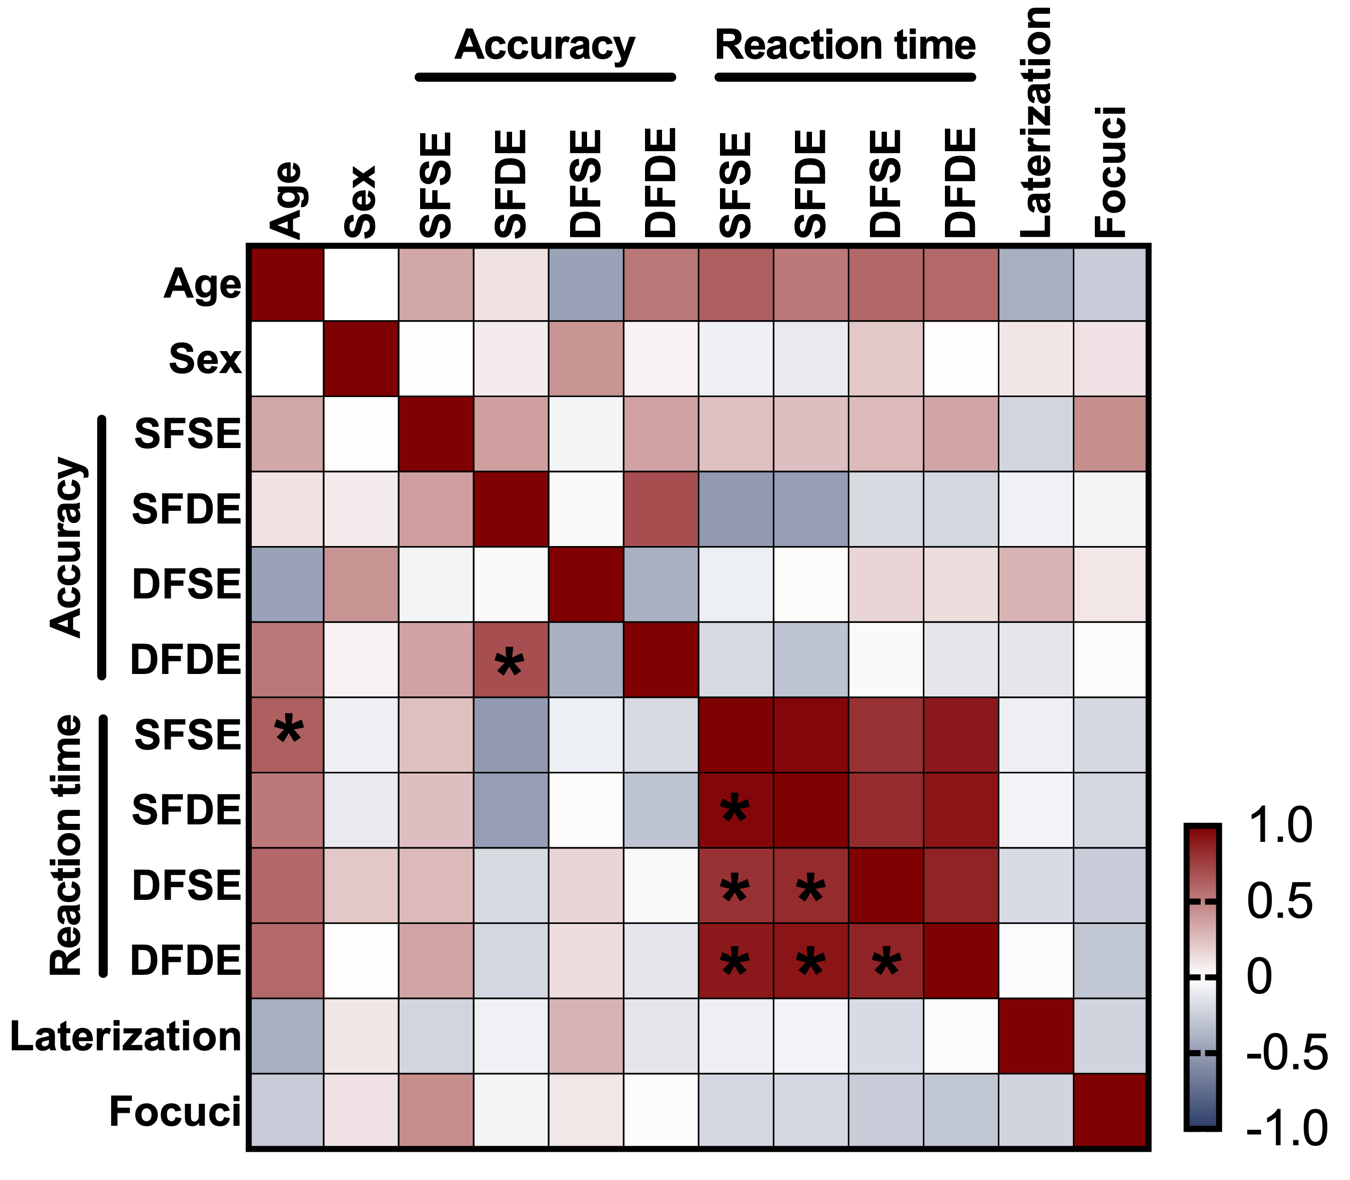


Figure S3. ERPs of subregions participating in the dysfunctional processing emotional incongruencies.

Averaged ERPs traces of trials were indicated as solid line and SEM was shown as the shadow. The gray vertical rectangles indicated the durations of S1 and S2, respectively. FDR corrected multiple t-test was applied between correct trials (green) and incorrect trials (dark red), and black horizontal bars indicated corrected *P* < 0.05.

Abbreviation: HIP, hippocampus; ITG, inferior temporal gyrus; MFG, middle frontal gyrus; PI, posterior insula; preCG, precentral gyrus; SFG, superior frontal gyrus. The sites label was shown in the template of left (.L) and right (.R) hemisphere.


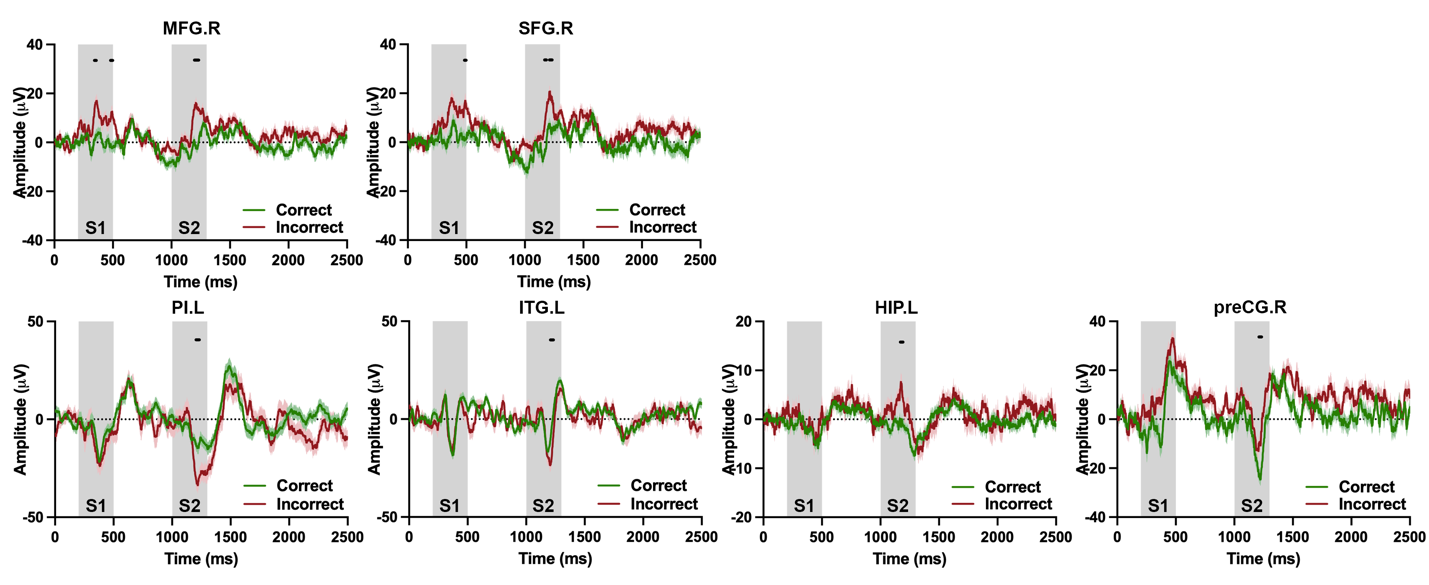


Figure S4. Correlation between subregions associated with incorrect discrimination of emotions across different time windows.

Correlation coefficients between sites locating in pairwise of nodes, which participant in correctly and incorrectly disciminating emotions, respectively. S1: the 300 ms duration of S1; S1-S2: the intervals between S1 offset and S2 onset; S2: the 300 ms duration of S1; >S2(401–700 ms): the 401–700 ms after S2 onset; >S2(701–1,000 ms): the 701–1,000 ms after S2 onset; and >S2(1,001–1,500 ms): the 1,001–1,500 ms after S2 onset. Each circle indicated the correlation coefficient between each pairwise site. Data were presented as mean ± SEM after a Mann-Whitney test. **P* < 0.05, ***P* < 0.01, and ****P* < 0.001.


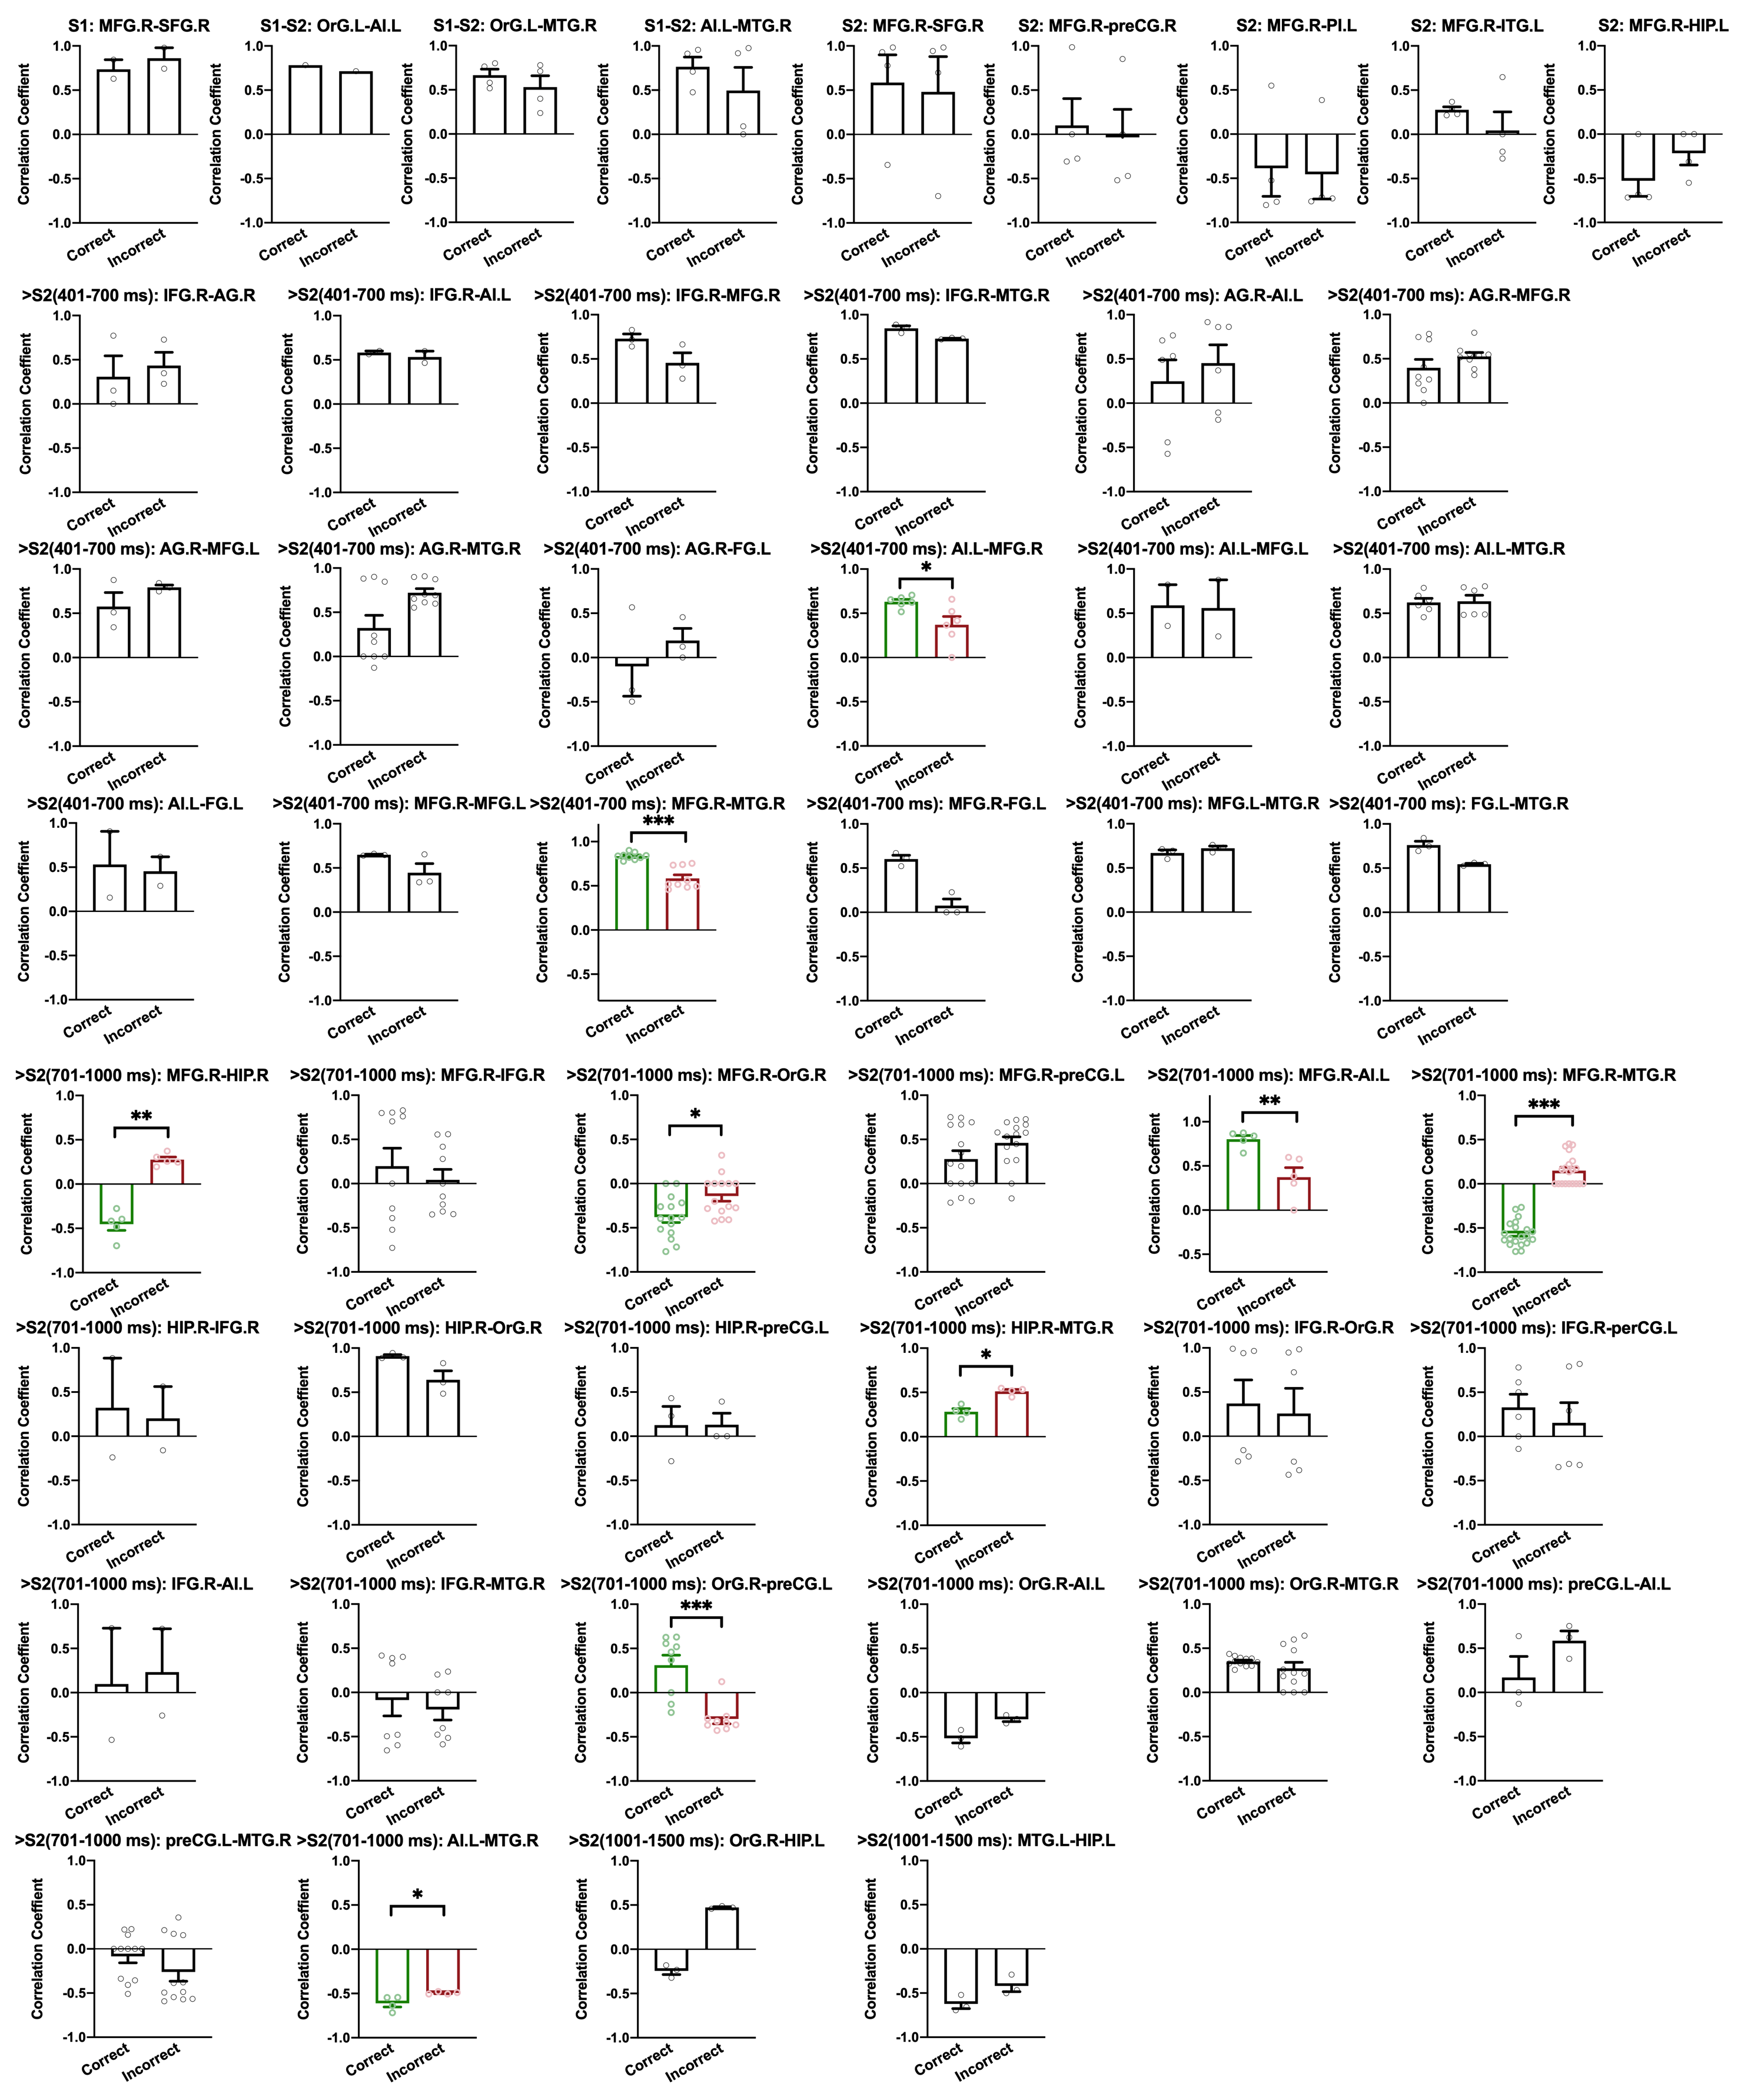


Table S1. SEEG recording information of 11 participants.

| **Subject NO.** | **Sex (F/M)** | **Age (years)** | **Available**  **sites count** | **Available**  **electrodes count** | **Epileptic Focus Localization** |
| --- | --- | --- | --- | --- | --- |
| **1#** | M | 18 | 38 | 10 | right insula |
| **2#** | M | 35 | 14 | 6 | right temporal |
| **3#** | M | 18 | 10 | 4 | right hippocampus |
| **4#** | F | 38 | 21 | 9 | right frontal |
| **5#** | F | 23 | 37 | 8 | left temporal |
| **6#** | F | 20 | 34 | 8 | right temporal |
| **7#** | F | 34 | 36 | 5 | left insular |
| **8#** | M | 45 | 37 | 9 | left insular |
| **9#** | F | 35 | 24 | 5 | right hippocampus |
| **10#** | M | 37 | 43 | 7 | left frontal |
| **11#** | F | 34 | 63 | 8 | left hippocampus |

Table S2. Subregions of individual cortical lobes locating the recording sites.

| **Lobes** | **Subregions** | **Site counts**  **(Left hemisphere)** | **Site counts**  **(Right hemisphere)** |
| --- | --- | --- | --- |
| **Frontal lobe** |  | **81** | **56** |
|  | Middle Frontal Gyrus  Inferior Frontal Gyrus  Precentral Gyrus  Orbital Gyrus  Superior Frontal Gyrus  Paracentral Lobule | 28  7  16  14  13  3 | 23  13  9  5  6  0 |
| **Parietal lobe** |  | **12** | **28** |
|  | Postcentral Gyrus  Supramarginal Gyrus  Angular Gyrus  Precuneus  Superior Parietal Lobule | 5  2  2  0  3 | 9  10  8  1  0 |
| **Temporal Lobe** |  | **70** | **36** |
|  | Superior Temporal Gyrus  Middle Temporal Gyrus  Inferior Temporal Gyrus  Parahippocampal Gyrus  Posterior Superior Temporal Sulcus  Fusiform Gyrus | 23  28  9  1  1  8 | 3  23  3  3  0  4 |
| **Insular lobe** |  | **23** | **15** |
|  | Posterior insula  Anterior insula | 9  14 | 5  10 |
| **Cingulate cortex** |  | **7** | **0** |
|  | Cingulate Gyrus | 7 | 0 |
| **Occipital lobe** |  | **8** | **5** |
|  | Occipital Gyrus  Cuneus  Superior Occipital Gyrus | 5  3  0 | 1  2  2 |
| **Subcortex** |  | **15** | **1** |
|  | Amygdala  Hippocampus | 2  13 | 0  1 |
